# Supplementary material
Source: PubMed Central journal article supplement (PMC3398990)
Supplement: epi-7-626-s01.pdf [file epi-7-626-s01.pdf]

**Supplemental Material to:**

de la Casa Esperón E, Cordier G, Engel N. A genomic reservoir for Tnfrsf genes is developmentally regulated and imprinted in the mouse. *Epigenetics* 2012; 7(6);

<http://dx.doi.org/10.4161/epi.20243>

<http://www.landesbioscience.com/journals/epigenetics/article/20243/>

**Table S1.**

|                 | Primers | Product size (bp)              | Location | Polymorphism        |           |   |
|-----------------|---------|--------------------------------|----------|---------------------|-----------|---|
|                 |         |                                |          | C57BL/6J            | B6(CAST7) |   |
| <i>Tnfrsf26</i> | 26F     | TAACCCTGTGTAAGATTGGTGAGTT      | 282      | Exon 2              | T         | C |
|                 | 26R     | CCAAACAGTTTTTCAGAGTCACAGTA     |          | Exon 4              |           |   |
| <i>Tnfrsf22</i> | 22F     | AGGTAAAATTTGCTATGCT            | 295      | Exon 2              | T         | G |
|                 | 22R     | TAGTAGTAAAGACCTGTTCGGCACT      |          | Exon 4              |           |   |
| <i>Tnfrsf23</i> | 23F     | AGGAACATTCACAGGGAAAGATAAT      | 361      | Exon 3              | T         | C |
|                 | 23R     | GTTTCTCTTCACAGCAATAAAAGGA      |          | Exon 6              |           |   |
| AK155734        | A-F     | CTGTCAGTAACTGTTTTGGTCCTGT      | 367      |                     | G         | A |
|                 | A-R     | GTTGACTACATTGGACCACTTCCTT      |          |                     |           |   |
|                 | B-F     | CAGAGTCCTGGATTTCAATGG          | 204      |                     |           |   |
|                 | B-R     | CAGCCTGAGGGAAGACAAGA           |          |                     |           |   |
|                 | C-F     | ACCAACAGATTTATATTACAGAAGAAAACA | 374      |                     |           |   |
|                 | C-R     | GGGTTGTAGTTTAAGGATGACTAGAGTATT |          |                     |           |   |
|                 | D-F     | TGACCCCTTCCATTTCTGAC           | 268      |                     |           |   |
|                 | D-R     | GAAAGTCCAGTCCCACTTGC           |          |                     |           |   |
|                 | E-F     | GCTTATGCATCTACTTCTGAGAACC      | 575      | Predicted<br>Exon 1 |           |   |
|                 | E-R     | GGGGAATCTAAACTCTGAGTCTCTT      |          | Predicted<br>Exon 3 |           |   |

## Appendix 1

### NUCLEOTIDE SEQUENCES:

>Mouse\_Tnfrsf22 (Mus musculus)

AGGTAAAATTTGCTATGCTAGAATTACACTCCTTCAAATGTCCCGCTGGTGA  
ATACTGGTCTAAAGACGTCTGTTGCAAGAAGTCTTCTGCAGGTACATTTGTC  
AAGGCGCCCTGCGAAATCCCCATACTCAAGGACAATGTGAGAAGTGTAC  
CCAGGAACATTCACAGAGAAAGATAATTACCTGGATGCTTGTATACTTTGCT  
CCACCTGTGATAAAGATCAGGAAATGGTGGCCGACTGCTCAGCCACCAGTG  
ACCGGAAATGCCAGTGCCGAACAGGTCTTTACTACTATGACCCAAAATTTCC  
AGAATCGTGCCGCCCATGTACCAAGTGTCCCCAAGGAATCCCTGTCCTCCA  
GGAATGCAACTCCACAGCTAACACTGTGTGCAGTTCATCTGTTTCAAGA

>Mouse\_Tnfrsf23 (Mus musculus)

GTAATATTTGCTATGCCTGAATCATACTCCTTCAACTGTCCCGATGGTGAATA  
CCAGTCTAATGATGTCTGTTGCAAGACCTGTCCCTCAGGTACATTTGTCAAG  
GCGCCCTGCAAATCCCCATACTCAAGGACAATGTGAGAAGTGTACCCCA  
GGAACATTCACAGGGAAAGATAATGGCCTGCATGATTGTGAACTTTGCTCCA  
CCTGTGATAAAGACCAGAATATGGTGGCTGACTGTTCTGCCACCAGTGACC  
GGAAATGCGAGTGCCAAATATGTCCCCAAGGAATCCCTGTCCTCCAGGAAT  
GCAACTCCACAGCTAACACTGTGTGCAGTTCATCTGTTTCA

>Mouse\_Tnfrsf26 (Mus musculus)

GTAGCAGTCTGCAGTGTAACACTATAACCCTGTGTAAGATTGGTGAGTTCA  
AACATGAGAACCTCTGCTGCCTACAATGTTCTGCTGGCACTTACCTCCGGAA  
TCCATGCCAGGAGAACCATAATAAGAGTGAATGTGCTCCATGTGATTCTGAA  
CACTTCATAGACCACAAAACAGAGAATCTGAATGCTTTCCCTGCTCTGTGT

GCCGGGACGACCAAGAAGAAGTGGCCAAATGTTCCCGTACAGCTGATCGT  
GTGTGCCAGTGTAAGCAGGGCACCTACTGTGACTCTGAAAAGTGTGGAG  
AGGTGCCACACATGCTCCAGCTGCCCTGACGGCAGAGTCGTCAGGAAATG  
CAATGCCACAATGGACACTGTGTGTGACAAGTTTGAAGCTCAGAGCCA

>Rat\_A (Rattus norvegicus)

CTAAAGACGCTAAGCCTACCTAAAGCCACCTAGCCCCTTATCCCTGTGTACC  
TGGAGCAAGGCTTACCTCATTGTCTGATCCCCAGGTATGTTTGTCCAGGA  
GCCCTGCACGATTCTCATAACCAAGGACGGTGTGAGACGTGTCCCCCAG  
GATCGTTCTCAAGGAGTGCTAATGACCTCAACTCTTGTATACCTTGCTCCAC  
CTGTACTAAAGAGCAGGAAATGGTGGCCGACTGCTCTGCCACCAGTGACCG  
GGTATGTCAGTGCCAAACAGGTCATTACTACTATGACCCGGAAGTTCCAGA  
GTTTTGCTGCCCATGTACCACGTGCCCCCAAGGAATCCCTGCCCTTCAGGA  
ATGCAACCCACCAACGACACAGTGTGCCGTCAGTCTGCTTCAAGT

>Rat\_B (Rattus norvegicus)

TCTTCAAGGTAAGCAGCACAACCCAGTGTGAGTCGAATGAGTTTAAACACG  
AGAAGTTCTGCTGCCAACTCTGCCCTGCTGGCACTCACCTCATTAAATCCATG  
CCACAGGAACCGTGGTGAGAGTGAATGTGCCCCATGTCAAGCTCAGCACTT  
CATAGATGTGAACAACAGGGAACCTGTCTGCTCTCGCTGCTCTAAGTGCCG  
GGATGACCAAGAAGAAGTGTCCGAGTGCTCCAGTACTGCTGATCGTAAGTG  
CTGGTGTAAGCAGGGCACCTACTGTGATTCTGAAAAGTGTGGAGATGTG  
CCATGATTGCAGCAGCTGTCCTGAGGGCAGAGTCATCCAGGAATGCAATGC  
CACAATGGACACTGTGTGTGAC

>Human (Homo sapiens)

GCAGGAGTCCAGGCCATTGGGGAAGGCTGTAAGTGTCACCTGGTCACACTT  
CATACTTTTCCTTGGGTGTAGGAGTTCACACAGGGTTCACCAACACACTCA  
CCTGGGCAAGAGGCTGGGCAGAGGTCAGATCC

>Pig (*Sus scrofa*)

GGCCAGTATGTCAGCCAACCGATGGCCGGGGACCACGGTGTTCGTAGCGTG  
CAGGCCGTGTCAGCCTGGAACCTTCAGTCCCTACGCCAGCGAGGAGACCA  
GCTGCCTGCCATGTGCCCTGTGCCGGAAGGATCAGGAGGTAGTGACCGAG  
TGCTCCCCGACCAGAGACCGGCAGTGCCAGTGCAAGCGGGGCCACTTCTT  
CTGCGACTCCATGGACTGCGAGGAGAACTGCTTCCGGTGTTCAGAGGTGTG  
AGCACAGCGCCGTCCTTCGACCCTGCAATGCCACCAGGGACGCGGTTTGT  
GCCGACAGACCTCACCCACAGCCG

>Chicken (*Gallus gallus*)

TGCGGAGAAGGAGAGTACTTAYAYGARGACATYTGCTGCATGCTGTGCCCG  
GCAGGTACTTACGTTGCTCAACACTGCAGGATTCCACATTCAAGGGGAAAA  
TGTGCCTCTTGCACTGAAGGAAGAGATTACACCGCCCATGCGAATGGCTTG  
GAAGAATGTTTACTATGTAGACAATGCAAAGACGATCAGATAACTTTGAGAA  
CCTGTACTGTGACCAGTGACACTGAGTGCCAGTGCCACCAGGGGTACTTCT  
GCCCTGCTGAAGGCTGTGAAATATGTCAGAGATGCACTGAAACGTGTCCAG  
AAGGGAGAGAAATTGTGCAGATTTGCAATGCTACAATGGACCTAGGATGTG  
GC

>Lizard (*Anolis carolinensis*)

GAATCTCCACCTTTGCGATGTAATGATGGAGAATATCCTTATAATGGTCAAC  
GTTGTTGCAAGATGTGCCGTGCAGGTACTIONTACGTTGAAGAAGCCTGTACCA  
TTCCACATACTTTGGGGCGCTGTTACCTTGCACAAACGGAGAGGATTACA  
CTGAGCATGAAAGTGGCCTTAATCAATGTTTTCTTGTGAGAAATGCAAACC

TGGATACGTCATGGTCAAAGCCTGCACTGCTACAAGCAACACAAAATGCCA  
GTGCCCTGAAGGGTACTACTGTCCCCAGGCTGTGAGGAATGTGTCAAGTG  
CAGGAAACGGTGTCTAAAGGAGAGGTGCAGGTCAAAGTTGCAGTAGCAC  
CACAGACATGGAGTGTTACCATCT

>Cow\_A (Bos taurus)

TCCCAGTCCTGCAGCCCCGGGAATACCGGCCAGTGGGCCGCTGCTGCAA  
GGCCTGCCAGCCGGCCATCTTGTCCGGTGAAGCACTGTAGGAGGTCCCCT  
CCTGGGGACAGTGTCTGCCATGTCCGCCCGGGACCTTTATGGAGAGGCTC  
AACGGAATGGAAGCCTGCTTCAAGTGCTCCACCTGCTCCAAGAATGAGGAA  
GTGTTAGAGGAGTGCACGCCGACCCACGACAGAGTGTGCCAGTGCCGATC  
GGGCTATTTCTACGCCACGTGGGATCCTCTGAAAGCTGCAGCCCGTGTAG  
CACGTGTCCCGCAGGGCACGTCATCGTCCAGAGCTGCAATGCTACGTCGG  
ACACGGTGTGC

>Cow\_B (Bos taurus)

ACCTCCTGTAACCCAGGCGAATATGAGGTTCCAGGCGACCTTTCCTGTAGC  
AGATTCTGCCCGGCTGGCTACTACGTAAGCAGACCCATAAACCAGGACCAC  
CACATCGGAGCCTGCTCGCAGTGCGAGTCTGGAACCTTTCAGAGCTCATCCC  
AACGAGCAGACACAATGCACGCCGTGTGCCAGTGCAAGAGAGGATCAGGA  
AGTGGTCAAACGCTGCTCCGCCACCAGCGACCCGGGAGTGCCAGTGCCAGC  
AGGGCAAGTTCTACTGCGACTCCGTGGACTGCAGAGAGAGCTGCTTCCGG  
TGTACAAGGTGTGAAGGAGACAGTGCCGTCCTTCAGCCCTGCAATGCCACA  
AGCAATACCATTTGTGCC

>Dog (Canis lupus familiaris)

CTCAAGGTGCCCATGGCAGCCATTGTGTCCGATTGTATGGAATATGAATATA  
AACCTGAGGGTCTCAACCTCTGCTGTGAAAAGTGCCCTGCCGGCCATTATG

TCAGCAAACACTGTGATAAAAACCATGGTGCTGGGGTATGTAGCCCGTGTG  
AACCTGGAAGCTACCTTCCCTACCGAAATGGGGAGACAAATTGTCGGCTGT  
GCAGTCGGTGCCGAGAGGACCAGGAGGTAGTCTCTCCATGCACAGCGACC  
CGTGACCAGCAGTGCCAGTGCAAGCCCGGCTACTTTTGTGACTCTGAAAAC  
TGCGTGGAGAACTGCTTCCGGTGT

>Horse (*Equus caballus*)

GAGGCTGAGGGTCTCCACCTGTGCTGCAAACCTCTGCCCAGCTGGGTCCTAC  
GTCAGCGAGCACTGCACGGTGAACCACAGCAAAGGGCAGTGCAGGGAATG  
TGAGCCTGGAACCTTCACTGCCCACCCACGGGGATGACCAGCTGCCTGC  
CGTGTGCCAGTGCCGGGAGGATCAGGAGGTGGTGACGAACTGCTCGCG  
GGTCAGCGACCGGCAGTGCCAGTGCCAGCAGGGCAGCTTCTACTGCGACT  
CCCCGGACTGCGCTGAGAAGTGTTTCCGCTGCACAAGGTGTCAAGGTTTCAG  
TCCTTCAGCCCTGCAGTGCCACACGGGATACAGTTTGT

>Elephant\_A (*Loxodonta africana*)

ATGCAGTGTGGCCAGATGAGCATGAACACGGCAACATCTGCTGCAGAAAC  
TGCATGAGTGGCCAGTACGTCAGGAAACCCTGCAGCGAGAACCATGGTGT  
GGAGAGTGTGAGGTGTGCGGGGATGAAACCTACACGTCCCACTCCAGTGG  
CTTGACCTACTGCCTACCGTGCACCCAGTGCCGGAAGGACCAGGAGGTGG  
TGGCCAACTGCACCAGGACCAGCAACCGGCAGTGCCAGTGCAAGACGGGA  
TTCTATTGTGAATCTGAGGACCGTGAGATATGCCGCCCGTGTACAGTTGTC  
CTGAAGGCACAGTCATCCGTCACCCCTGCAATGCTACGACGGACACAGTGT  
GT

>Elephant\_B (*Loxodonta africana*)

TAATTGAAGGTGATCACGGTGGCCAGTAGGATGCAGTGTGGCCAGATGAG  
CATGAACATGACAACATCTGCTGCAGAACTGCACGAGTGGCCAGTACGTC

AGGAAACCCTGCAGCGAGAACCATGGTGTGGAGAATGTGAGGTGTGCGA  
GGATGAAACCTACATGTCCCCTCCAGTGGCTTGACCTACTGCCTACCGTG  
CACCCAGTGCCGGAAGGACCAGGAGGTGGTGGCCAACTGCACCAGGACCA  
GCAACCGGCAGTGCCAGTGCAAGACGGGATTCTATTGTGAATCTGAGGACT  
GTGAGATATGCCGTCCGTGTACAGTTGTCCTGAAGGTACAGTCATCCGTC  
ACCCCTGCAACGCTACGACGGACACAGTGTGTGAAGAA

>Cat (*Felis catus*)

GAGTACCAGCCGGAGGACAGCAACCTCTGCTGCCGGCTCTGCCCCGCTGG  
CCAGTACGTCTTCAGACCGTGCAGCGTGAACCATACCGCTGGCGAGTGCC  
GCGTCTGTGAATCGGGCACCTTCCTCGCCTTCCCTAATGGCGAGCCTACTT  
GCCAGAGGTGCATCCAGTGCCGGAAGGATCAGGAGGTGGTGGCCAAGTGC  
TCCCCACCAGCGACCGGCAGTGTGAGTGCAAAAAGGGGAGCTTCTACTG  
CAACTCTGTGGACTGCGTGGAAAAGTGCCTGCGGTGTAAAAGGTGTCCTGG  
CGTTGTCCTGTCCCCTTGCAATGCTACCAGCAACACGGTTTGTGCCACA

>Sheep\_A (*Ovis aries*)

TCCTGCAGCCCCAGGGAATACTGGATAGCGGGCCGCTGCTGCAAGGCCTG  
CCCAGCCGGCCAGCATGTCCGGTGAAGCACTGCCAGAGGTCCCCTCCTGGG  
GACAGTGTGTGCCGTGTCCGCCCGGGACCTTTATGAACTGCCTCAACGGGA  
TGGAAGCCTGCTTCAAGTGCTCTGCCTGCTCCAAGAATGAGGAAGTGTTGG  
AGGAGTGCACGCCGACCGACGACCTAGTGTGCCAGTGCCGACCAGGCTAT  
TTCTACGTGGGATCCTCTGAAAGCTGTAGCCCGTGTAGC

>Sheep\_B (*Ovis aries*)

TGTAACCCAGGCGAATATGAGGTCCTAGGCAACGATTCTGCAGCAGAGTC  
TGCCCGCCTGGCTACTACGTAAGCACACACATAGACCAGGACCACCACATC  
GGAGCCTGCTCGCCTTGCCCATCTGGAACCTTTCAGAGCTCATCCAGTGAA



GAGCCTCGATGCGTGCCGTGTGCCAGTGCCGAGAGGCAGATCAGGAAGT  
GGTGAAGCTCTGCTCCACGACCAGCGACCAGGAGTGCCAGTGCCAGCCGG  
GCCAGTTCTACTGTGACTCCGAGGACTGCACAGAAAGCTGCTTCCGGTGCA  
CAAGGTGTGGAGACGGCGCCACCCTTCAACCCTGCACTGCCACAAGCAAT  
GCAATTTGT

>Wallaby (*Macropus eugenii*)

GGGACCCGAGTCCTCAAGCATTGTACCATTCTCACACCTTGGGAAGCTGT  
GAAGGATGCCCCCTGGGGAATATGCCCTTAAAAATGGACTGGAAACCTGC  
AGGCAGTGTGCCAGTGACAGAGAAGACCAAGAGATGGTGAGACCCTGTCT  
TGGGAGTATGAACACCAAGTGCCAGTGTAAGGAGGGATACTATTGTGAGTC  
CCCAGACTGCGAGATGTGCCAGCGCTGCACAGAG

>Mouse\_Tnfrsf1a (*Mus musculus*)

TGTCCCAAGGAAAGTATGTCCATTCTAAGAACAATTCCATCTGCTGCACCA  
AGTGCCACAAAGGAACCTACTTGGTGAGTGACTGTCCGAGCCCAGGGCGG  
GATACAGTCTGCAGGGAGTGTGAAAAGGGCACCTTTACGGCTTCCCAGAAT  
TACCTCAGGCAGTGTCTCAGTTGCAAGACATGTTCGAAAGAAATGTCCCAG  
GTGGAGATCTCTCCTTGCCAAGCTGACAAGGACACGGTGTGTGGCTGTAAG  
GAGAACCAGTTCCAACGCTACCTGAGTGAGACACACTTCCAGTGCGTGGAC  
TGCAGCCCCTGCTTCAACGGCACCGTGACAATCCCCTGTAAGGAGACTCAG  
AACACCGTGTGTAAC

>Rat\_Tnfrsf1a (*Rattus norvegicus*)

AATTTGTGTCCCAGGGAAAGTATGCCCATCCAAAGAATAATTCCATCTGCT  
GCACCAAGTGCCACAAAGGAACCTACTTGGTGAGTGACTGTCCAAGCCCAG  
GGCAGGAAACAGTCTGCGAGGTGTGTGATAAAGGCACCTTTACAGCTTCGC  
AGAACCACGTCAGACAGTGTCTCAGTTGCAAGACATGTTCGAAAGAAATGT

TCCAGGTGGAGATTTCTCCTTGCAAAGCTGACATGGACACCGTGTGTGGCT  
GCAAGAAGAACCAATTCCAGCGCTACCTGAGTGAGACGCATTTCCAGTGTG  
TGGACTGCAGCCCCTGCTTCAATGGCACCGTGACAATCCCCTGTAAGGAGA  
AACAGAACACCGTGTGTAAC

AMINO ACID SEQUENCES:

>Mouse\_Tnfrsf22 (Mus musculus)

LLLLLNLPVQVLFAMLELHSFKCPAGEYWSKDVCCKNCSAGTFVKAPCEIPHTQ  
GQCEKCHPGTFTTEKDNLYLDACILCSTCDKDQEMVADCSATSDRKQCQRTGLY  
YYDPKFPESCRPCTKCPQGIPVLQECNSTANTVCSSSVSNP

>Mouse\_Tnfrsf23 (Mus musculus)

LLLLLNLPVIFAMPESYSFNCPDGEYQSNDVCKTCPSGTFVKAPCKIPHTQ  
GQCEKCHPGTFTGKDNGLHDCELCSTCDKDQNMVADCSATSDRKCECQIGLY  
YYDPKFPESCRPCTKCPQGIPVLQECNSTANTVCSSSVSNP

>Mouse\_Tnfrsf26 (Mus musculus)

LLLLLGLLLRVAVCSVNTITLCKIGEFKHENLCCLQCSAGTYLRNPCQENHNKSE  
CAPCDSEHFIDHKNRESECFPCSVCRDDQEEVAKCSRTADRVCQCKQGTYCD  
SENCLERCHTCSSCPDGRVVRKCNATMDTVCDKFDSEP

>Rat\_A (Rattus norvegicus)

SPGMFVQEPCTIPHTQGRCECPPGFSRSANDLNSCIPCSTCTKEQEMVADC  
SATSDRVCQCQTGHYYYDPEVPEFCCPCTTCPQGIPALQECNPTNDTVCRQS  
ASS

>Rat\_B (*Rattus norvegicus*)

VFKVSSTTQCESNEFKHENFCCQLCPAGTHLINPCHRNRGESCAPCQAQHF  
DVNNREPVCSRCSKCRDDQEEVSECSSTADRKCWCKQGTYCDSENCLEMCH  
DCSSCPEGRVIQECNATMDTVCD

>Human (*Homo sapiens*)

GSDLCPASCPGECVGEPCVNSYTQGKCMKCDQVTLTAFPNGLDSC

>Pig (*Sus scrofa*)

GQYVSQPMAGDHGVVACRPCQPGTFSPYASEETSCLPCALCRKDQEVVTECS  
PTRDRQCQCKRGHFFCDSMDCEENCFQCQRCEHSAVLRPCNATRDAVCADR  
PHPQP

>Chicken (*Gallus gallus*)

CGEGEYLXEDICMLCPAGTYVAQHCRIPHSRGKSCASCTEGRDYTAHANGLEE  
CLLCRQCCKDDQITLRTCTVTSDETCQCHQGYFCPAEGCEICQRCTETCPEGRE  
IVQICNATMDLGCG

>Lizard (*Anolis carolinensis*)

ESPPLRCNDGEYPYNGQRCKMCRAGTYVEEACTIPHTLGRCSPCTNGEDYT  
EHESGLNQCFPCCKPGYVMVKAATSNKTCQCEGYCPCPGCEECVKCR  
KRCPKGEVQVKSCSSTTDMECSPS

>Cow\_A (*Bos taurus*)

SQSCSPGEYRPVGRCKACPAGHLVGEHCRRSHSWGQCLPCPPGTFMERLN  
GMEACFKCSTCSKNEEVLEECTPTHDRVCQCRSGYFYAHVGSSESCSPCSTW  
VTCPAGHVIVQSCNATSDTVCRLP

>Cow\_B (*Bos taurus*)

TSCNPGEYEVPDGLSCSRFCPAGYYVSRPINQDHHIGACSQCESGTFRAHPNE  
QTQCTPCAQCREGEDQEVVKRCSATSDR  
ECQCQQGKFYCDSDCRESCFRCTRCEGDSAVLQPCNATSNTICA

>Dog (*Canis lupus familiaris*)

LKVPMAAIVSDCMEYEYKPEGLNLCCEKCPAGHYVSKHCDKNHGAGVCSPCE  
PGSYLPYRNGETNCRLCSRREGKWTTARHSDQEVVSPCTATRDQQCQCKP  
GYFCDSENCVENCFRCGLYPGREKYSRFLHFFSCPDPHVSSPCNATRDTVCNT  
QDTTDTTS

>Horse (*Equus caballus*)

EAEGHLHCCKLCPAGSYVSEHCTVNHSKGQCRECEPGTFTAHTGMTSCLPC  
AQCREDEEVVTNCSRVSQRQCQCQGSFYCDSPDCAEKCFRCTRRCQGSVLQ  
PCSATRDTVC

>Elephant\_A (*Loxodonta africana*)

MQCGPDEHEHGNICCRNCMSGQYVRKPCSENHGVGECEVCGDETYTSHSSG  
LTYCLPCTQCRKDQEVVANCTRRTSNRQCQCKTGIFYCESEDREICRPCHSCPE  
GTVIRHPCNATTDTVCC

>Elephant\_B (*Loxodonta africana*)

LKVITVASRMQCGPDEHEHDNICCRNCTSGQYVRKPCSENHGVGECEVCEDE  
TYMSHSSGLTYCLPCTQCRKDQEVVANCTRTRTSNRQCQCKTGIFYCESEDCEIC  
RPCCHSCPEGTVIRHPCNATTDTVCEE

>Cat (*Felis catus*)

EYQPEDSNLCCRLCPAGQYVFRPCSVNHTAGECRVCESGTFLAFPNGEPTCQ  
RCIQCRKDQEVVAKCSPTSDRQCQCKKGSFYCNSVDCVENCLRCKRCPGVVL  
SPCNATSNTVCAT

>Sheep\_A (*Ovis aries*)

SCSPREYWIAGRCKKACPAGQHVGHEHCQRSHSWGQCVPCPPGTFMNCLNG  
MEACFKCSACSKNEEVLEECTPTDDLVCQCRPGYFYVGSSESCSPCS

>Sheep\_B (*Ovis aries*)

CNPGEYEVLGNDSCSRVCPGGYYVSTHIDQDHHIGACSPCPSGTFRAHPSEEP  
RCVPCAQCREADQEVVKLCSTTSDQECQCQPGQFYCDSEDCTESCFRCTRC  
GDGATLQPCTATSNAIC

>Wallaby (*Macropus eugenii*)

GTRVLKHCTIPHTLGSCEGCPPGEYALKNGLETQRQCAQCREDQEMVRPCLG  
SMNTKCQCKEGYCESPDCEMCQRCTE

>Mouse\_Tnfrsf1a (*Mus musculus*)

CPQGKYVHSKNNSICCTKCHKGTYLVSDCPSPGRDTVCRECEKGTFTASQNYL  
RQCLSCKTCRKEMSQVEISPCQADKDTVCGCKENQFQRYLSETHFQCVCDCSP  
CFNGTVTIPCKETQNTVCN

>Rat\_Tnfrsf1a (Rattus norvegicus)

CPQGKYAHPKNNSICCTKCHKGTYLVSDCPSPGQETVCEVCDKGTFTASQNH  
VRQCLSCKTCRKEMFQVEISPCKADMDTVCGCKKNQFQRYLSETHFQCVCDCS  
PCFNGTVTIPCKEKQNTVCN
